# Supplementary material
Source: MDPI journal article supplement (https://www.mdpi.com/1999-4907/11/1/97)
Supplement: s1 [file s1]

**Table S1** Effects of canopy position on nut yield and quality indicated by degree of freedom (DF), F and *p* values derived from ANOVA analyses

| Parameter           | Source         | DF | F       | <i>P</i>      |
|---------------------|----------------|----|---------|---------------|
| Nut yield           | Between Groups | 5  | 122.018 | 0.000 (<0.01) |
|                     | Within Groups  | 42 |         |               |
|                     | Total          | 47 |         |               |
| Nut weight          | Between Groups | 5  | 4.887   | 0.001 (<0.01) |
|                     | Within Groups  | 42 |         |               |
|                     | Total          | 47 |         |               |
| Starch content      | Between Groups | 5  | 4.143   | 0.004 (<0.01) |
|                     | Within Groups  | 42 |         |               |
|                     | Total          | 47 |         |               |
| Total sugar content | Between Groups | 5  | 6.362   | 0.000 (<0.01) |
|                     | Within Groups  | 42 |         |               |
|                     | Total          | 47 |         |               |
| Fat content         | Between Groups | 5  | 4.206   | 0.004 (<0.01) |
|                     | Within Groups  | 42 |         |               |
|                     | Total          | 47 |         |               |
| Protein content     | Between Groups | 5  | 3.716   | 0.007 (<0.01) |
|                     | Within Groups  | 42 |         |               |
|                     | Total          | 47 |         |               |

**Table S2** Effects of canopy position on light intensity during each month indicated by degree of freedom (DF), F and *p* values derived from ANOVA analyses

| Month | Source         | DF | F       | <i>P</i>      |
|-------|----------------|----|---------|---------------|
| 5     | Between Groups | 5  | 216.014 | 0.000 (<0.01) |
|       | Within Groups  | 42 |         |               |
|       | Total          | 47 |         |               |
| 6     | Between Groups | 5  | 453.630 | 0.000 (<0.01) |

|    |                |    |         |               |
|----|----------------|----|---------|---------------|
|    | Within Groups  | 42 |         |               |
|    | Total          | 47 |         |               |
| 7  | Between Groups | 5  | 569.120 | 0.000 (<0.01) |
|    | Within Groups  | 42 |         |               |
|    | Total          | 47 |         |               |
| 8  | Between Groups | 5  | 695.578 | 0.000 (<0.01) |
|    | Within Groups  | 42 |         |               |
|    | Total          | 47 |         |               |
| 9  | Between Groups | 5  | 756.135 | 0.000 (<0.01) |
|    | Within Groups  | 42 |         |               |
|    | Total          | 47 |         |               |
| 10 | Between Groups | 5  | 263.145 | 0.000 (<0.01) |
|    | Within Groups  | 42 |         |               |
|    | Total          | 47 |         |               |

**Table S3** Effects of canopy position on temperature during each month indicated by degree of freedom (DF), F and *p* values derived from ANOVA analyses

| Month | Source         | DF | F       | <i>P</i>      |
|-------|----------------|----|---------|---------------|
| 5     | Between Groups | 5  | 68.721  | 0.000 (<0.01) |
|       | Within Groups  | 42 |         |               |
|       | Total          | 47 |         |               |
| 6     | Between Groups | 5  | 93.931  | 0.000 (<0.01) |
|       | Within Groups  | 42 |         |               |
|       | Total          | 47 |         |               |
| 7     | Between Groups | 5  | 127.210 | 0.000 (<0.01) |
|       | Within Groups  | 42 |         |               |
|       | Total          | 47 |         |               |
| 8     | Between Groups | 5  | 135.170 | 0.000 (<0.01) |
|       | Within Groups  | 42 |         |               |

|    |                |    |         |               |
|----|----------------|----|---------|---------------|
|    | Total          | 47 |         |               |
| 9  | Between Groups | 5  | 116.327 | 0.000 (<0.01) |
|    | Within Groups  | 42 |         |               |
|    | Total          | 47 |         |               |
| 10 | Between Groups | 5  | 84.023  | 0.000 (<0.01) |
|    | Within Groups  | 42 |         |               |
|    | Total          | 47 |         |               |

---

**Table S4** Effects of canopy position on humidity during each month indicated by degree of freedom (DF), F and *p* values derived from ANOVA analyses

| Month | Source         | DF | F       | <i>P</i>      |
|-------|----------------|----|---------|---------------|
| 5     | Between Groups | 5  | 232.423 | 0.000 (<0.01) |
|       | Within Groups  | 42 |         |               |
|       | Total          | 47 |         |               |
| 6     | Between Groups | 5  | 194.361 | 0.000 (<0.01) |
|       | Within Groups  | 42 |         |               |
|       | Total          | 47 |         |               |
| 7     | Between Groups | 5  | 163.969 | 0.000 (<0.01) |
|       | Within Groups  | 42 |         |               |
|       | Total          | 47 |         |               |
| 8     | Between Groups | 5  | 166.361 | 0.000 (<0.01) |
|       | Within Groups  | 42 |         |               |
|       | Total          | 47 |         |               |
| 9     | Between Groups | 5  | 153.697 | 0.000 (<0.01) |
|       | Within Groups  | 42 |         |               |
|       | Total          | 47 |         |               |
| 10    | Between Groups | 5  | 178.379 | 0.000 (<0.01) |
|       | Within Groups  | 42 |         |               |
|       | Total          | 47 |         |               |

---
